# Supplementary material
Source: Research Square preprint supplement (doi:10.21203/rs.3.rs-9626620/v1)
Supplement: Supplementary file 1 [file afb84c560d745851afa4c567.docx]

**Tea-Derived Carbon Quantum Dot-Modified PCN-415-NH2 Nanocomposite as a Bifunctional Adsorbent–Photocatalyst for Efficient Wastewater Treatment under Visible Light**

Tina Reyhani, Azita Shahnazi, Ali Haseli, Roya Sedghi

Department of Polymer and Materials Chemistry, Faculty of Chemistry and Petroleum Sciences, Shahid Beheshti University, Tehran, 1983969411, Iran.

**Supplementary material:**


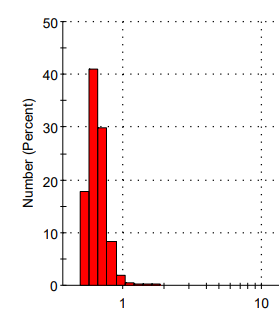


**Fig. S1**: The particle size distribution of CQDs.


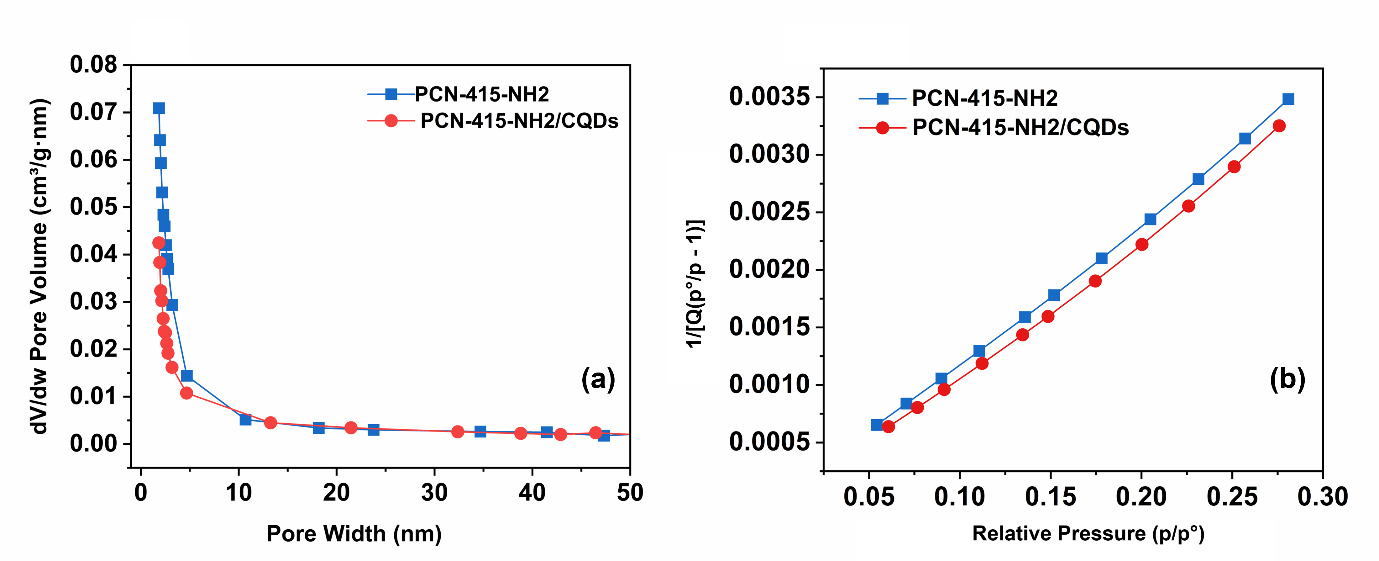


**Fig.S2:** The BJH adsorption curves (a) and the BET surface area plots (b) of the samples.


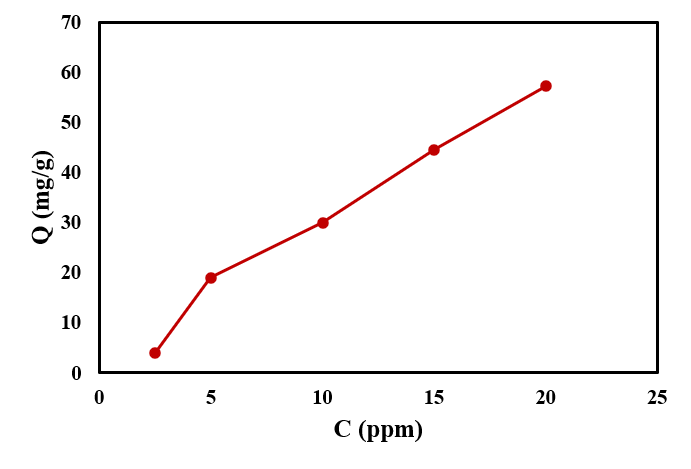


**Fig. S3:** Adsorption capacity of PCN-415-NH₂/CQDs as a function of initial concentrationof RhB.

**Fig. S4:** Pseudo-second-order kinetic model for RhB adsorption on PCN-415-NH2/CQDs.


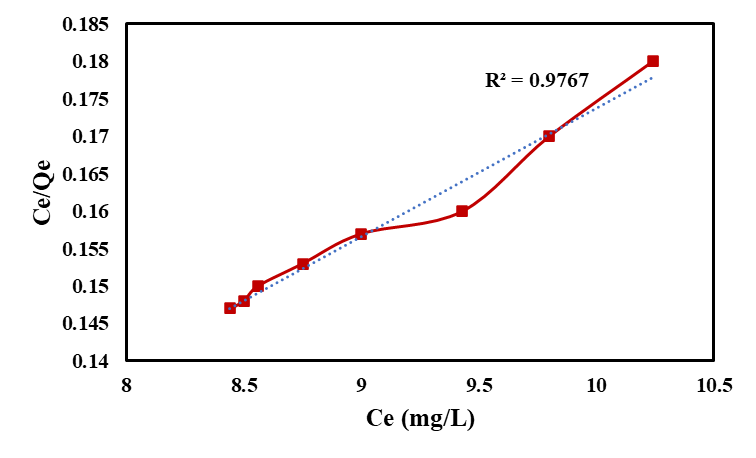

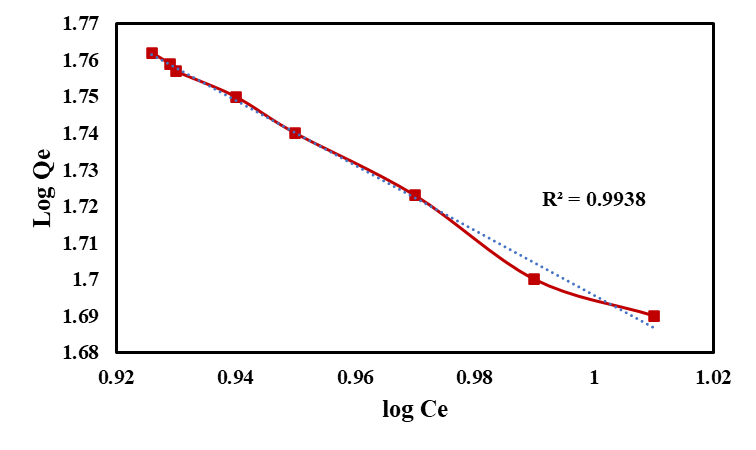


**(a)**

**(b)**

**Fig. S5**: Linearized (a) Langmuir and (b) Freundlich isotherm plots for RhB adsorption.


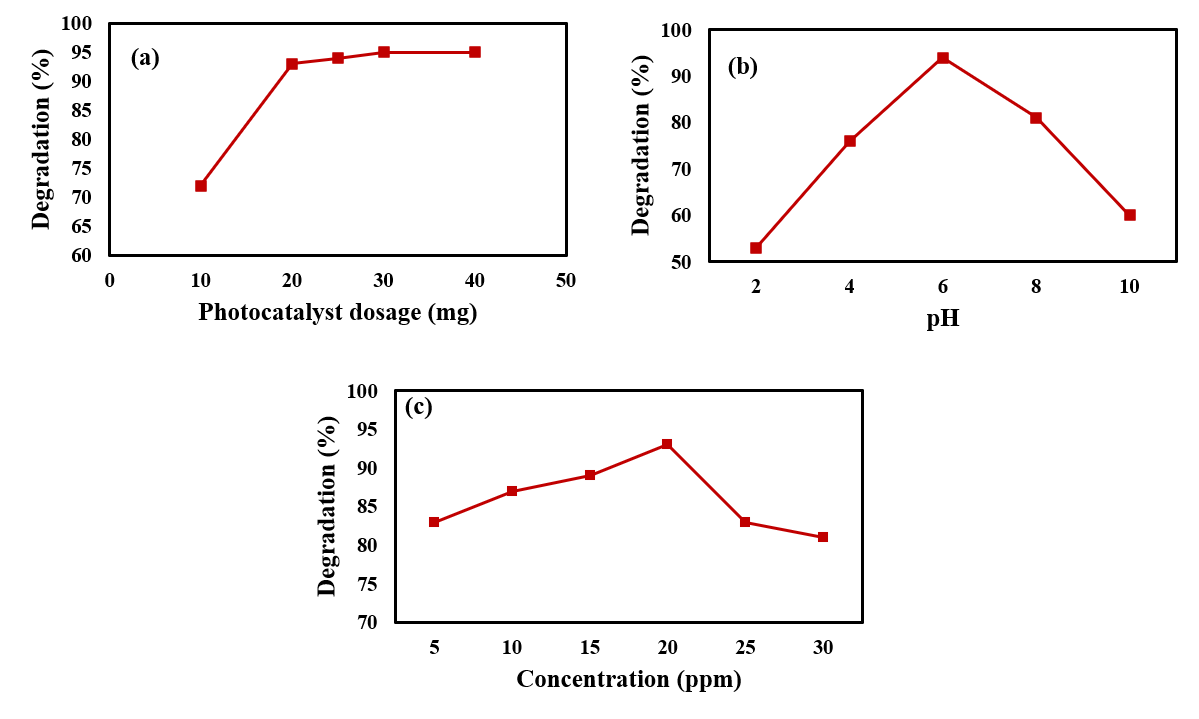


**Fig. S6:** Optimization of RhB photodegradation parameters: (a) PCN-415-NH2/CQDs dosage, (b) initial solution pH, and (c) RhB concentration.


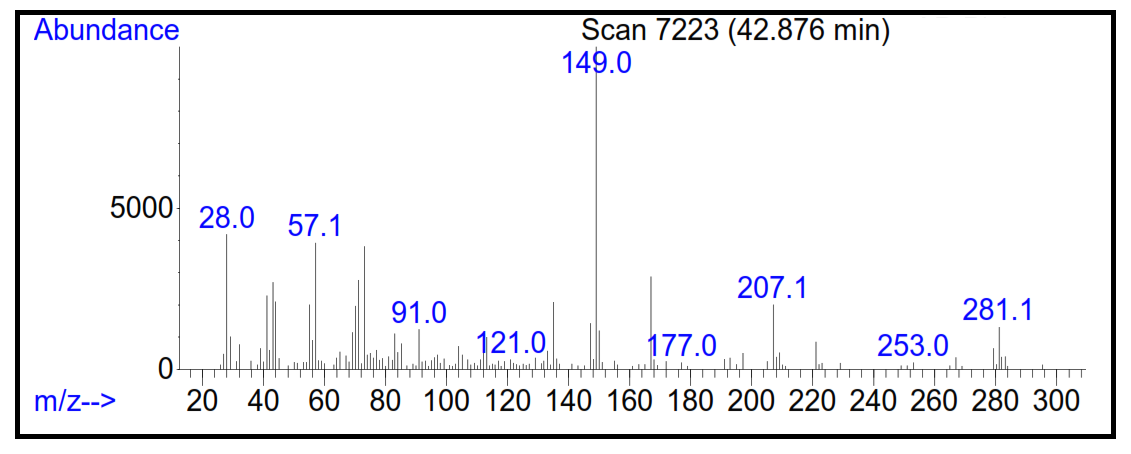


**Fig. S7:** Mass spectrum of Diisobutyl phthalate.
